# Supplementary material for: Attitude towards Intranasal Vaccines and Psychological Determinants: Effects on the General Population in Northern Italy
Source: Vaccines (Basel). 2023 Jan 7;11(1):138. doi: 10.3390/vaccines11010138 (PMC9863592; doi:10.3390/vaccines11010138)
Supplement: Supplementary file 1 [file vaccines-11-00138-s001.zip › vaccines-2127189-supplementary.pdf]

## SUPPLEMENTARY MATERIALS

Table S1. Survey Tool

| ITEMS                                                                                            | RESPONSE                                                                                                                                                                                                                                                                                                                                                                                                                                                                                     |
|--------------------------------------------------------------------------------------------------|----------------------------------------------------------------------------------------------------------------------------------------------------------------------------------------------------------------------------------------------------------------------------------------------------------------------------------------------------------------------------------------------------------------------------------------------------------------------------------------------|
| <b>Socio-demographic Data</b>                                                                    |                                                                                                                                                                                                                                                                                                                                                                                                                                                                                              |
| Age                                                                                              | (Number)                                                                                                                                                                                                                                                                                                                                                                                                                                                                                     |
| Education                                                                                        | <input type="radio"/> Primary school<br><input type="radio"/> Secondary school<br><input type="radio"/> High school<br><input type="radio"/> University (Undergrade or Postgrade)<br><input type="radio"/> Post-university (e.g., PhD)                                                                                                                                                                                                                                                       |
| Employment status                                                                                | <input type="radio"/> Working<br><input type="radio"/> Unemployed<br><input type="radio"/> Retired<br><input type="radio"/> Student<br><input type="radio"/> Occasional worker                                                                                                                                                                                                                                                                                                               |
| Geographical area of origin                                                                      | <input type="radio"/> North Italy<br><input type="radio"/> Central Italy<br><input type="radio"/> South Italy<br><input type="radio"/> Italian Islands                                                                                                                                                                                                                                                                                                                                       |
| Do you work as health care professional?                                                         | <input type="radio"/> Yes<br><input type="radio"/> No                                                                                                                                                                                                                                                                                                                                                                                                                                        |
| Do you suffer from one or more organic diseases?<br>Select one or more of the following options: | <input type="radio"/> No<br><input type="radio"/> Yes, diseases of the respiratory system<br><input type="radio"/> Yes, diseases of the immune system<br><input type="radio"/> Yes, oncological diseases<br><input type="radio"/> Yes, metabolic diseases<br><input type="radio"/> Yes, liver diseases<br><input type="radio"/> Yes, kidney diseases<br><input type="radio"/> Yes, cardiovascular diseases<br><input type="radio"/> Yes, psychiatric diseases<br><input type="radio"/> Other |
| <b>PERCEPTION OF VACCINES</b>                                                                    |                                                                                                                                                                                                                                                                                                                                                                                                                                                                                              |
| 1. I have had at least one of the mandatory childhood vaccinations.                              | <input type="radio"/> YES<br><input type="radio"/> NO                                                                                                                                                                                                                                                                                                                                                                                                                                        |
| 2. I have had non-mandatory vaccines at least once.                                              | <input type="radio"/> YES<br><input type="radio"/> NO                                                                                                                                                                                                                                                                                                                                                                                                                                        |
| 3. In general, I think vaccines are useful.                                                      | 1-4 (1=Not at all; 4=Very much)                                                                                                                                                                                                                                                                                                                                                                                                                                                              |
| 4. In general, I think vaccines can be risky.                                                    | 1-4 (1=Not at all; 4=Very much)                                                                                                                                                                                                                                                                                                                                                                                                                                                              |
| 5. Why do you think vaccines may be a risk? You can select more than one option.                 | <input type="radio"/> I do not think vaccines are a risk at all<br><input type="radio"/> Personal negative experience<br><input type="radio"/> Negative experience of family and/or friends<br><input type="radio"/> Negative reported experience of acquaintances<br><input type="radio"/> Medical opinions<br><input type="radio"/> Media (TV, Internet, etc.), press<br><input type="radio"/> Scientific journals                                                                         |
| 6. Vaccines worry me because of their possible short term side effects.                          | 1-4 (1=Not at all; 4=Very much)                                                                                                                                                                                                                                                                                                                                                                                                                                                              |
| 7. Vaccines worry me because of their possible long term side effects.                           | 1-4 (1=Not at all; 4=Very much)                                                                                                                                                                                                                                                                                                                                                                                                                                                              |

|                                                                                                                                                                |                                                                                                                                                                                                                                                                                                                                                                                                                                                                                                                                                                                                                                                                                                                                                        |
|----------------------------------------------------------------------------------------------------------------------------------------------------------------|--------------------------------------------------------------------------------------------------------------------------------------------------------------------------------------------------------------------------------------------------------------------------------------------------------------------------------------------------------------------------------------------------------------------------------------------------------------------------------------------------------------------------------------------------------------------------------------------------------------------------------------------------------------------------------------------------------------------------------------------------------|
| 8. In general, I think vaccines can protect myself and my family members from serious diseases.                                                                | 1-4 (1=Not at all; 4=Very much)                                                                                                                                                                                                                                                                                                                                                                                                                                                                                                                                                                                                                                                                                                                        |
| 9. In general, I think I am sufficiently informed about vaccines.                                                                                              | 1-4 (1=Not at all; 4=Very much)                                                                                                                                                                                                                                                                                                                                                                                                                                                                                                                                                                                                                                                                                                                        |
| 10. What image/word/phrase comes to mind when you think of vaccines?                                                                                           | (Free answer)                                                                                                                                                                                                                                                                                                                                                                                                                                                                                                                                                                                                                                                                                                                                          |
| <b>MODE OF VACCINE ADMINISTRATION</b>                                                                                                                          |                                                                                                                                                                                                                                                                                                                                                                                                                                                                                                                                                                                                                                                                                                                                                        |
| 11. Generally, the opportunity to choose between intramuscular (needle) and intranasal (spray) route of administration could encourage me to get vaccinations. | 1-4 (1=Not at all; 4=Very much)                                                                                                                                                                                                                                                                                                                                                                                                                                                                                                                                                                                                                                                                                                                        |
| 12. I worry less about nasal vaccine, because I consider it less invasive for the immune system and for my health.                                             | 1-4 (1=Not at all; 4=Very much)                                                                                                                                                                                                                                                                                                                                                                                                                                                                                                                                                                                                                                                                                                                        |
| 13. I worry less about nasal vaccine, because it is needle-free.                                                                                               | 1-4 (1=Not at all; 4=Very much)                                                                                                                                                                                                                                                                                                                                                                                                                                                                                                                                                                                                                                                                                                                        |
| 14. I would worry less if my family members received nasal vaccine, because I consider it less invasive for the immune system and for their health.            | 1-4 (1=Not at all; 4=Very much)                                                                                                                                                                                                                                                                                                                                                                                                                                                                                                                                                                                                                                                                                                                        |
| 15. I would worry less if my family members received nasal vaccine, because it is needle-free.                                                                 | 1-4 (1=Not at all; 4=Very much)                                                                                                                                                                                                                                                                                                                                                                                                                                                                                                                                                                                                                                                                                                                        |
| 16. I think intranasal vaccine may cause fewer side effects.                                                                                                   | 1-4 (1=Not at all; 4=Very much)                                                                                                                                                                                                                                                                                                                                                                                                                                                                                                                                                                                                                                                                                                                        |
| 17. I think intranasal vaccine has adequate efficacy.                                                                                                          | 1-4 (1=Not at all; 4=Very much)                                                                                                                                                                                                                                                                                                                                                                                                                                                                                                                                                                                                                                                                                                                        |
| 18. If you had the choice, which would you prefer between the two modes of delivery?                                                                           | <input type="radio"/> Intramuscular<br><input type="radio"/> Nasal<br><input type="radio"/> I don't mind                                                                                                                                                                                                                                                                                                                                                                                                                                                                                                                                                                                                                                               |
| 19 A. In any vaccination, how much would you be willing to vaccinate yourself with intramuscular vaccine on a scale from 1 to 10?                              | 1= nothing<br>10=very much                                                                                                                                                                                                                                                                                                                                                                                                                                                                                                                                                                                                                                                                                                                             |
| 19 B. In any vaccination, how much would you be willing to vaccinate yourself with nasal spray on a scale from 1 to 10?                                        |                                                                                                                                                                                                                                                                                                                                                                                                                                                                                                                                                                                                                                                                                                                                                        |
| 20. Which of the following variables impact more on your attitude toward vaccination? You can select more than one option.                                     | <input type="checkbox"/> Type of vaccine (e.g., mRNA, inactivated live virus, etc.).<br><input type="checkbox"/> Mode of administration (needle vs. spray)<br><input type="checkbox"/> Confidence in pharmaceutical companies<br><input type="checkbox"/> Mistrust in pharmaceutical companies<br><input type="checkbox"/> Confidence in health care personnel and physicians<br><input type="checkbox"/> Mistrust in health care personnel and physicians<br><input type="checkbox"/> Confidence in scientific research<br><input type="checkbox"/> Mistrust in scientific research<br><input type="checkbox"/> Opinions of friends or relatives<br><input type="checkbox"/> Mass media, newspapers, magazines<br><input type="checkbox"/> Other: ... |
| 21. I would be more confident with nasal administration of COVID-19 vaccine.                                                                                   | 1-4 (1=Not at all; 4=Very much)                                                                                                                                                                                                                                                                                                                                                                                                                                                                                                                                                                                                                                                                                                                        |
| 22. I have had COVID-19 vaccine.                                                                                                                               | <input type="radio"/> YES<br><input type="radio"/> NO                                                                                                                                                                                                                                                                                                                                                                                                                                                                                                                                                                                                                                                                                                  |

**Table S2.** Parcels' composition

| Latent Variables                          | Parcels | Items                                                            |
|-------------------------------------------|---------|------------------------------------------------------------------|
| <b>Intolerance of Uncertainty</b>         | INCA    | $(ITEM\ 1 + ITEM\ 3 + ITEM\ 4 + ITEM\ 10) / 4$                   |
|                                           | INCB    | $(ITEM\ 5 + ITEM\ 6 + ITEM\ 9 + ITEM\ 12) / 4$                   |
|                                           | INCC    | $(ITEM\ 2 + ITEM\ 7 + ITEM\ 8 + ITEM\ 11) / 4$                   |
| <b>Persecutory Ideation</b>               | PAA     | $(ITEM\ 1 + ITEM\ 2 + ITEM\ 3 + ITEM\ 4 + ITEM\ 5) / 5$          |
|                                           | PAB     | $(ITEM\ 6 + ITEM\ 7 + ITEM\ 8 + ITEM\ 9 + ITEM\ 10) / 5$         |
| <b>Perceived control</b>                  | COA     | $(ITEM\ 1 + ITEM\ 2R + ITEM\ 5R + ITEM\ 7R + ITEM\ 8R) / 5$      |
|                                           | COB     | $(ITEM\ 12 + ITEM\ 24R + ITEM\ 14R + ITEM\ 16R + ITEM\ 29) / 5$  |
|                                           | COC     | $(ITEM\ 15R + ITEM\ 20R + ITEM\ 19 + ITEM\ 25R + ITEM\ 23R) / 5$ |
| <b>Vaccine Hesitancy</b>                  | VAXC    | $(ITEM\ 7 + ITEM\ 9) / 2$                                        |
|                                           | VAXD    | $(ITEM\ 3 + ITEM\ 4 + ITEM\ 6) / 3$                              |
| <b>Attitude toward intranasal vaccine</b> | VAXA    | $(ITEM\ 14 + ITEM\ 16) / 2$                                      |
|                                           | VAXB    | $(ITEM\ 12 + ITEM\ 13 + ITEM\ 15) / 3$                           |

**Table S3.** Effects of socio-demographic variables on dependent variables

| Standardized direct of Covariates on dependent variables |          |             |          |               |
|----------------------------------------------------------|----------|-------------|----------|---------------|
| <i>Effects- Model 3a</i>                                 | <i>B</i> | <i>S.E.</i> | <i>p</i> | <i>95% CI</i> |
| Age → Attitude                                           | -.001    | .004        | .86      | [-.006,.009]  |
| Gender → Attitude                                        | -.036    | .061        | .56      | [-.156,.091]  |
| Education → Attitude                                     | .001     | .034        | .99      | [-.062,.074]  |
| Healthcare Worker → Attitude                             | -.046    | .067        | .49      | [-.167,.098]  |
| Organic Disease → Attitude                               | .091     | .057        | .10      | [-.001,.226]  |
| Age → Hesitancy                                          | .001     | .003        | .85      | [-.005,.006]  |
| Gender → Hesitancy                                       | -.126*   | .056        | .03      | [-.023, .244] |
| Education → Hesitancy                                    | -.029    | .032        | .37      | [-.032,.094]  |
| Healthcare Worker → Hesitancy                            | -.213**  | .066        | .00      | [-.090,-.342] |
| Organic Disease → Hesitancy                              | .003     | .049        | .95      | [-.096,.093]  |
| Age → Control                                            | .007     | .002        | .00      | [.010,.003]   |
| Gender → Control                                         | -.032    | .067        | .63      | [-.095,.168]  |
| Education → Control                                      | .014     | .034        | .68      | [-.080,.051]  |
| Healthcare Worker → Control                              | -.094    | .058        | .11      | [-.211,.019]  |
| Organic Disease → Control                                | .002     | .063        | .97      | [-.113,.133]  |
